# Supplementary material for: CETCh-seq: CRISPR epitope tagging ChIP-seq of DNA-binding proteins
Source: HighWire-hosted journal article supplement (doi:10.1101/gr.193540.115), 2015-09-09
Supplement: Supplemental_Table_2.xlsx [file Supplemental_Table_2.xlsx]

## Sheet: Sheet1
DNA-binding protein	Species	No of gRNAs	gRNA 1 sequence	gRNA 1 on-target score	gRNA 1 off-target score	gRNA 2 sequence	gRNA 2 on-target score	gRNA 2 off-target score	5-prime homology arm type	5-prime homology arm size (bp)	5-prime homology arm sequence	3-prime homology arm type	3-prime homology arm size (bp)	3-prime homology arm sequence	Endogenous sequences deleted	No. endogenous deleted bps	Notes on deleted endogenous sequences	Endogenous exon sequence	Introduced synonymous codon sequene in exon
RAD21	Human	1	GCCAAGGTTCCATATTATATA	13	37	N/A	N/A	N/A	PCR	991	GCAAAATGCCAAGCAAGTTGCtcaaggtttcttaaaataggacagttgacatgtgtttattaattttttactttaaaaactataagtgctagattttactactatattacattagctgtctaaagaaattggttattttaataatacatgtcagaacaattttgctggtttcttggactttcttatttggattttagatgtaccataacatactttggccttttaccctcttgattaacatgagaatcacatactatttaaaaaagtgcaatctttgtcctaagcagaatatatagtttgttttttccagtaaccaaaattagcatctgtgttagtctgttttgtgttgctctaaaggaatacctgagtctgggtaatttataaagaagtttatttggc…	PCR	1618	AGCTAGAAGCATTATAGCTAGTGtttgattcactagtgcttacaaattgcccccatgtgtaggggacacagaaccctttgagaaaacttagatttttgtctgtacaaagtctttgcctttttccttcttcatttttttccagtacattaaatttgtcaatttcatctttgagggaaactgattagatgggttgtgtttgtgttctgatggagaaaacagcaccccaaggactcagaagatgattttaacagttcagaacagatgtgtgcaatattggtgcatgtaataatgttgagtggcagtcaaaagtcatgatttttatcttagttcttcattactgcattgaaaaggaaaacctgtctgagaaaatgcctgacagtttaatttaaaactatggtg…	TAAGG	5	stop codon plus first 2 bases of 3'UTR	N/A	N/A
CREB1	Human	2	GCCACAAATCAGATTAATTT	9.7	32.5	GCCACAAATCAGATTAATT	1.4	36.4	PCR	903	AAGGTGCGGCCCAACCTCactcttttgcatgtggatatccaggtttcccagcaccatttgttgaagagactgttagatttttttaaatgccctgaaatgattagtttgtaagattttctatttaaaggattgttacacattgaaatttagctttaatgttttcttagttattgatatggatagaatttcaagttttgcaggaattatgcagaatattttaattaatagtaagatgtaatttttaagtggtcatttaggtcttgtttgtttatggagttgtttttttgtttgtttctttgagacggagtctcactcttgtcactcaggctggagtgcagtggcgcaatctcagcttactgcagcctctgcctcccaggttcaagcgatgcccatggctca…	PCR	580	GGGATTTAAATTTTCACCTGTTAAGgtggaaaatggactggcttggccacaacctgaaagacaaaataaacattttattttctaaacatttctttttttctatgcgcaaaactgcctgaaagcaactacagaatttcattcatttgtgcttttgcattaaactgtgaatgttccaacacctgcctccacttctcccctcaagaaattttcaacgccaggaatcatgaagagacttctgcttttcaacccccaccctcctcaagaagtaataatttgtttacttgtaaattgatgggagaaatgaggaaaagaaaatctttttaaaaatgatttcaaggtttgtgctgagctccttgattgccttagggacagaattaccccagcctcttgagctgaagt…	TAATTT	6	stop codon plus first 3 bases of 3'UTR	N/A	N/A
ATF1	Human	1	GTAGGAATCAAACACTTTTAT	5.2	32.1	N/A	N/A	N/A	gBlock	800	AGAACTGAGTATTTGCTCAAGCATTGTTTGTAATTTGAACTTAAATAAAAGAAGTCATGTGTCAGAAGTTAACCAGAGGACCCATAATTTCACTCTTTGGTATTTATTCAAGAGAAATGAAACCTTTCTACAAAAAGACTGGCACAAAAACATGCCTATGCAGCTAACCCTAGAAACATCGCAAGAGACTGGATACACAAATGGTGGTTATATTCATACAGTGAACTATGTCCAGCAGTGTGAAGGAACAAACCCCCATGCAGCAACATGGATGAACCTCAGATGGGCTGAGTGAAGGGACACCAGAGTACATAGTGTATGACACTCTTACATGAGGTTCTAGAATAGGAAAAAAACTAATCTCTGGTGATAAAAATCAAAACGATAGTTGCTTGGAAG…	PCR	804	TCCTAAGAAAGAAAATATTTTTGTGGacatgcataaaaattaaatggatttcctagtggagttttataaattaaaaggtcaaaactgaagctttttatttaggcttttccaaatcaaggataaatatcttacgcacgatatctagtgacagaggagaaagtggaaaatgacctcaaggaagctacgggcacaactggaagctttgtagaaattaaacatattcaaggagcaagaaatgaactttcagcagtctaaattttctaaataaccaatagttgccaatctaaaatggcagagaagatgaaatttgataaactgaattttttttaaaaatccatttaccctacaggtttgcatttgtttgctgaaatttacctttttttagttatatatatgtgt…	TGAT	4	stop codon plus first 1 base of 3'UTR; synonymous mutations were made in the last 4 codons of the gene sequence	AAT-AAA-AGT-GTT	AAC-AAG-TCC-GTG
NR1H2	Human	2	GGTGGCCAGCCCCTCACTCG	14.9	41.5	GATCTGGGACGTCCACGAGTG	1.7	48	PCR	779	CACGGGGCACAGGTGGACagaaatgacaagaacgctgtaattactgctgtgttcccagccccagagactgtgggcagcgccagggtccaggatgtggggcacggtttcgggctgagggagtcacgggctgcctcccgccccgcaggcctgcaggtggagttcatcaaccccatcttcgagttctcgcgggccatgcggcggctgggcctggacgacgctgagtacgccctgctcatcgccatcaacatcttctcggccgaccggcccaacgtgcaggagccgggccgcgtggaggcgttgcagcagccctacgtggaggcgctgctgtcctacacgcgcatcaagaggccgcaggtagggccccgcagagcctctgcgcagagccaactacgtcccgcg…	PCR	940	CTGGCCACCCAGCCCCACAGccttgcctgaccaccctccagcagatagacgccggcaccccttcctcttcctagggtggaaggggccctgggccgagcctgtagacctatcggctctcatcccttgggataagccccagtccaggtccaggaggctccctccctgcccagcgagtcttccagaaggggtgaaagggttgcaggtcccgaccactgacccttcccggctgccctccctccccagcttacacctcaagcccagcacgcagtgcaccttgaacagagggaggggaggacccatggctctcccccctagcccgggagaccagggccttcctcttcctctgcttttatttaataaaaactaaaaacagaaacaggaaaataaaatatgaataca…	TGAGGGG	7	stop codon plus first 4 bases of 3'UTR	N/A	N/A
GABPA	Human	2	GAAAAGGATAATTGAGCCCC	3.1	29.4	GTTTGGAGTCTCAGAATGTCC	4.3	36.5	PCR	995	GTCTCTTTGCAATGTCCTTTACCTGTTTTTCTGTATCCTCTGTTTCTTTTAGACCTTTTCCTTAGACTTAAAGCTCCCTATTGGGCTTGGATAATTTATCTGAAATTTGGAAAGCGTTTACATAGTGAAATAATAAAGATGAAGACATGACTTCATCATATAGGATTCTTTACAAGACAGAAAAGAAGTGGAATATATGTATTAATTTTTTTTATATTATCGATTTTTATTAACATAGCTTATATTTTGTAGAGGGCTGTGTGCCAGTCATTGTATACTAAGCACTTTACAAAGATTATCCCTTTAATCCTCAACAATGATATGAGGGTATAAGCACTGTTAACCTCACTTTATAGATGAGGAATAAAAGCTTTGAGAAAATATGACTCCTGTGGTCTC…	PCR	831	ACTCCAAAGTCTTTCTTAAAATGTTTAGAGCAAGTATAGCTCTTACCTTTATTACTGAATTTGAATCTTCTTTTATTTCTAGGCTGTACAGTCTGATGCATGATTTTTTTATAAATATTTCATACTCTTGTGAATTTGGATCTTTTTACTTTGAGCATATATTTTAGAATATGTGTATGTTAAAGGATCTCCACAATGTCTGCAGTGTGAAGGCAGGTTCATTGTGGAATAGTTTAACAGTCAGGAAGGCTAAACTGGTCAGTATTAATGTGTAGCCCTACCAAAAATAGCCAGTAGTATCTGAAAATGAAAAATAAATGAAGTATCTCTAGGAAACAGTCTGGCTTAACTATTTTTGAAAATATAACTGTTTCCCCTCTCTGCTGCTTTAGATGTTGC…	TGAGCCCCAGGACATTCTGAG	21	stop codon plus first 18 bases of 3'UTR	N/A	N/A
GABPA	Mouse	2	GTGAGACCTAGGACCTCCT	23.1	72.3	GAACCTTAAGACTCCCCAGG	39.1	64.3	gBlock	800	TATAAAACAAAAGTGGACTTCACAACCAACCATCTGTAACTTTTTGTTATCTGGATTCCTGTTAACATAGCTTATATTTTATAGAGAGTTAACTGTGGCAGTCATTGTAAGCTAAGCACTTTATAAAGATTATCCCTCTATTCAACAGTTCTATGAGGGTAAGTACTGTTTTAACCTCATTTTCTAGATGAGGAATAAAGGATTAAAGGAACTAGGATGGTCCTGTGGTCACAGAGGCAGCAAGTGAGGCCTTGCGGTGTATCTCTGACTTTCCAAGGCTCTTTTGTTTTGTCTTCTCTTTAGTAATTCTGTTGGTTTCTAAAGCAATGTTATCAGAGTTGTTAAAAATGTATTTTGAAAGTTTCATATATAAGATTCTGGAGTAGTGAGGACTGAAGT…	gBlock	800	GGGGAGTCTTAAGGTTTTTCTTAAATATTTAGAGCAAGCTTTGCTCTAACCTTTATTACTGAATTTGAATCGTATTTCTAGAGTGTACAATCTGATGCATGATTTTTTTTATAAATATTTCATACTCTTGTGAATTTGGATCTTTTTACGTTGAACATATATTTTAGAATATGTTAAAGGATCACCACGATGCCTGCAATGTGAGAGCAGGTTCATCGGGGTAGTTTGCTAACAGTCAGGAAAGCTAAACTGGTCAGTATTAATGTCTAGCCCTACCAAAAAATAGCCAGTAGCGTCTGAAGATGAAAGGAGGGAAGCATTTCCAGGAAACAGCCTGGTGTAGCCACTGCGGGCGTGGAGCTGTTTCCTCTCCGCTGCTTTACACAGAGCCTGAAAAAG…	TGAGACCTAGGACCTCCT	18	stop codon plus first 15 bases of 3'UTR	N/A	N/A
