# Supplementary material for: CETCh-seq: CRISPR epitope tagging ChIP-seq of DNA-binding proteins
Source: HighWire-hosted journal article supplement (doi:10.1101/gr.193540.115), 2015-09-09
Supplement: Supplemental_Table_3.xlsx [file Supplemental_Table_3.xlsx]

## Sheet: Sheet1
TF	Species	5' Homolgous Arm Forward Primer	5' Homolgous Arm Reverse Primer	3' Homolgous Arm Forward Primer	3' Homolgous Arm Reverse Primer	5' HR Validation Forward Primer	5' HR Validation Reverse Primer	3' HR Validation Forward Primer	3' HR Validation Reverse Primer
RAD21	Human	tccccgacctgcagcccagctGCAAAATGCCAAGCAAGTTGC	ccggaacctcctccgctcccTATAATATGGAACCTTGGTCCAG	agttcttctgattcgaacatcAGCTAGAAGCATTATAGCTAGTG	tggagaggactttccaagGACCACCACCAACTGAATAATG	GTAAGCCGGAAAAGCATGGAG	cagcaggctgaagttagtagc	accgcttcctcgtgctttac	GCAACAGGCCTAGTCAGAGG
CREB1	Human	tccccgacctgcagcccagctAAGGTGCGGCCCAACCTC	ccggaacctcctccgctcccATCTGATTTGTGGCAGTAAAGGTCC	agttcttctgattcgaacatcGGGATTTAAATTTTCACCTGTTAAG	tggagaggactttccaagACATAAAAAGCACTCCAAATTC	GGCTGTTCTTGAACACATGGG	cagcaggctgaagttagtagc	accgcttcctcgtgctttac	TGAAGGCTTTCTTGGTGGTG
ATF1	Human	na (gBlock synthesized)	na (gBlock synthesized)	agttcttctgattcgaacatcTCCTAAGAAAGAAAATATTTTTGTGG	tggagaggactttccaagAGAATAAGTAATGGATATTCAACTGC	GCTGGTCTCGAACTCCTGAC	cagcaggctgaagttagtagc	accgcttcctcgtgctttac	AAACGCTGGTGTACTGACAG
NR1H2	Human	tccccgacctgcagcccagctCACGGGGCACAGGTGGAC	ccggaacctcctccgctcccCTCGTGGACGTCCCAGATC	agttcttctgattcgaacatcCTGGCCACCCAGCCCCACAG	tggagaggactttccaagGGTCCCAGCGATTGCCTCTG	GGTCCTAGTTTGCCCAGGAC	cagcaggctgaagttagtagc	accgcttcctcgtgctttac	ACTCTCACTTCCGCTGTTCC
GABPA	Human	tccccgacctgcagcccagctGTCTCTTTGCAATGTCCTTTACC	ccggaacctcctccgctcccATTATCCTTTTCCGTTTGCAG	agttcttctgattcgaacatcACTCCAAAGTCTTTCTTAAAATG	tggagaggactttccaagAGGAAGCCATAACAAACCAAAAC	TGGATGGCAAGGAATTGTTGG	cagcaggctgaagttagtagc	accgcttcctcgtgctttac	TGCTAACAATGCCATCTTGCC
GABPA	Mouse	na (gBlock synthesized)	na (gBlock synthesized)	na (gBlock synthesized)	na (gBlock)	TTGGGATCCCTCGTGGTTTG	cagcaggctgaagttagtagc	accgcttcctcgtgctttac	AGTGTTAGCAAGCAGTAAGGC
