# Supplementary material for: CETCh-seq: CRISPR epitope tagging ChIP-seq of DNA-binding proteins
Source: HighWire-hosted journal article supplement (doi:10.1101/gr.193540.115), 2015-09-09
Supplement: Supplemental_Table_4.xlsx [file Supplemental_Table_4.xlsx]

## Sheet: Sheet1
Cell	TF	5' HR Validation Sanger sequence (Endogenous-FLAG)	3' HR Validation Sanger sequence (Neomycin-Endogenous)
HepG2	RAD21	NNNNGNNNNNTTNTNNNNNNNNNNNNNNNNNNNNNNNNTNANNNNNNNGNNCATANNNNNNNNNNNNNTNNTNNTTNAANNNNNNNCNNNNNNNNNNNNANCAANNNTNNNNNNNGNNTTNNNTNGGNNNATTTCATTANTTNGNNNNNTTTAGNNNNGNACCCNNTTNNNNANNCNTTTGGCCCNTTTTTNNCCNNNCTTNNATTTANCNNNGGAGAATCCTCCNTACTNNNTAAAAAAAANNNCCANTNNTTNGTCTTAAGCAGNAATANAATAGTTTGTTNTTNNNAGTANCCAAAANTAAGCATTNGGNGTAGNNTGNNNTTGNGTNNCTNTAAAGGAAATNCCTGAGTCTGGGNAATTTNTAAAGGAAGTTTATTTGGCTCACAGTTCTGCAGA…	NNNNNNNNNNNTNNNNNGNGCGTTNNGNTACTCAAGCTATGCATCAAGCTTGGTACCGAGCTCGGATCCACTAGTAACGGCCGCCAGTGTGCTGGAATTCAGGGGCCGCTTTTCTGGATTCATCGACTGTGGCCGGCTGGGTGTGGCCGACCGCTATCAGGACATAGCGTTGGCTACCCGTGATATTGCTGAAGAGCTTGGCGGCGAATGGGCTGACCGCTTCCTCGTGCTTTACGGTATCGCCGCTCCCGATTCGCAGCGCATCGCCTTCTATCGCCTTCTTGACGAGTTCTTCTGATTCGAACATCAGCTAGAAGCATTATAGCTAGTGTTTGATTCACTAGTGCTTACAAATTGCCCCCATGTGTAGGGGACACAGAACCCTTTGAGAAAACTTAG…
HepG2	ATF1	NNNNNNNNNCNNNNNNNNNNNTNNNNNNNNNNNNNNNNNNTANNNNNNNNNNNNNNCCNNNNNNNNNGNGNNNNNNNNNNNNNNNNNNNCCNNNNNNNNNNNNNANANANNCGNNNGNNNNTNTNNCNNNNNNNNNNTNTNNTNNNNNNNNNNNNNNAAAAGANNNNNTNNNNNNNNNANANNNNCCNNGNGNNNNCCNNANATNNNNNNNNNNNGNNNNNNNNNNNANNNNNANNNNNNNCNNTTTTTNNNNNAAANNNNNNNGNNNNNAAAAANNNNGNNNNNNNNNNNNNNNNCCNNNNNNANNNNNNNNNNNNNNGGGNANNNCNNAANNGGGGGNNTNTNNNNNNNNNNNNGNNNNNNNNNNNCNNNNNNNNNNNNNNNNNNNNCCCCAANGNA…	NNNNNGNNNGNGGCGACGCTATCAGGACATAGCGTTGGCTACCCGTGATATTGCTGAAGAGCTTGGCGGCGAATGGGCTGACCGCTTCCTCGTGCTTTACGGTATCGCCGCTCCCGATTCGCAGCGCATCGCCTTCTATCGCCTTCTTGACGAGTTCTTCTGATTCGAACATCTCCTAAGAAAGAAAATATTTTTGTGGACATGCATAAAAATTAAATGGATTTCCTAGTGGAGTTTTATAAATTAAAAGGTCAAAACTGAAGCTTTTTATTTAGGCTTTTCCAAATCAAGGATAAATATCTTACGCACGATATCTAGTGACAGAGGAGAAAGTGGAAAATGACCTCAAGGAAGCTACGGGCACAACTGGAAGCCTTGTAGAAATTAAACATATTCAAG…
HepG2	CREB1	NNNNNNNNGGGTNTNGANNNCNGTAGNCNNCNNNNCCNNNNNGNNNNCCNNNNNTTGNAGNNTNNGNNGNNCCCTNNNANNNANNNNNNNCNNCCCAGCGTCGNGGTTNANNNCNNNNNTNNCCNCCGNCCTGCAGCCCAGNTAANGNTGCGGCCCCNACCCTCNNTCTTTTGCATGTGGATNNCCAGGTTTCCCCAGCACCCATTTGTTGAAGAGACTGTTAGATTTTTTTAAATGCCCTGAAATGATTAGTTTGTAAGATTTTCTATTTAAAGGATTGTTACACATTGAAATTTAGCTTTAATGTTTTCTTAGTTATTGATATGGATAGAATTTCAAGTTTTGCAGGAATTATGCAGAATATTTTAATTAATAGTAAGATGTAATTTTTAAGTGGTC…	NNNNNNNGGGNNNGNGACNGCTATCAGGACNNAGCGTTGGCTACCCGTGATATTGCTGAAGAGCTTGGCGGCGAATGGGCTGACCGCTTCCTCGTGCTTTACGGTATCGCCGCTCCCGATTCGCAGCGCATCGCCTTCTATCGCCTTCTTGACGAGTTCTTCTGATTCGAACATCGGGATTTAAATTTTCACCTGTTAAGGTGGAAAATGGACTGGCTTGGCCACAACCTGAAAGACAAAATAAACATTTTATTTTCTAAACATTTCTTTTTTTCTATGCGCAAAACTGCCTGAAAGCAACTACAGAATTTCATTCATTTGTGCTTTTGCATTAAACTGTGAATGTTCCAACACCTGCCTCCACTTCTCCCCTCAAGAAATTTTCAACGCCAGGAATCA…
HepG2	GABPA	NNNNGNANGNANGNNCATGNNNNANNCANNNNGNNTNTTTNCNANNNCNNNAAAAGAANNNGANNANNNNNNNNNNNNNTNTNTCGANTTTTANNNNATAGCTNNNNTTNNTAGAGGNNTGTGNNCCAGTCANNGTATACTAAGCNCTTTANAAAGATTANCCCTTAATCCTCANCAATGATATGAGGGTANAAGCACTNTTAACCTCACTTTATAGATGAGGAATAAAAGCTTTGAGAAAATATGACTCCTGTGGTCTCAAAAATGTTAGGTTTTGAATCTTGGCTTTCTGACTCCAAAGCTCTTGTTCTTAGGCTCTTCTACTGCTCTCAAGGTTTTTTGTTTTGTTTAATAATTATTTTTAAATCAATGTTTTATTCTAATTGTTGAAAATATGTT…	NNNNNNNNNNNNNNNNNNNNGNNNTNTAGATGCATGCTCGAGCGGCCGCCAGTGTGATGGATATCTGCAGAATTCAGGGGCCGCTTTTCTGGATTCATCGACTGTGGCCGGCTGGGTGTGGCCGACCGCTATCAGGACATAGCGTTGGCTACCCGTGATATTGCTGAAGAGCTTGGCGGCGAATGGGCTGACCGCTTCCTCGTGCTTTACGGTATCGCCGCTCCCGATTCGCAGCGCATCGCCTTCTATCGCCTTCTTGACGAGTTCTTCTGATTCGAACATCACTCCAAAGTCTTTCTTAAAATGTTTAGAGCAAGTATAGCTCTTACCTTTATTACTGAATTTGAATCTTCTTTTATTTCTAGGCTGTACAGTCTGATGCATGATTTTTTTATAAAT…
MCF7	RAD21	CANNNNNANNTNNCANNGGTNNNGNGNNNCNNNGNAAAGNGAAGNNTCGGNNNGGNTNTGCNNNCANNANNGNCNNNTACCNGNCAGGNNCANNCCNTTTCCATGCNNTTGTTTCNTNCGNNNNNNNNTTNNNNNNNNNNNNNNTGACGACNNNNGCANNCAAACAAACAANNNNNNNCNCNTGAGTNNCCANNTNCNNNNANNANNGACTNACACCCNNANNNNNNNNAANNACNNCCANNTTNTTNNNTGATTAGCAGCACNAATNNNNTNATNCGTTTCCNNNNGCANANAATCACGAAATGANGNCNNNCNNCTNNTGGNAGTGACCCGAAAANGNNNNTCCTGCAGCCTGGGAGATCAGAAAACAAANANTTTNNTNNTNTNCCATTNTCTGNG…	NNNNNNNNNNNTNNNNNGNGCGTTNNGNTACTCAAGCTATGCATCAAGCTTGGTACCGAGCTCGGATCCACTAGTAACGGCCGCCAGTGTGCTGGAATTCAGGGGCCGCTTTTCTGGATTCATCGACTGTGGCCGGCTGGGTGTGGCCGACCGCTATCAGGACATAGCGTTGGCTACCCGTGATATTGCTGAAGAGCTTGGCGGCGAATGGGCTGACCGCTTCCTCGTGCTTTACGGTATCGCCGCTCCCGATTCGCAGCGCATCGCCTTCTATCGCCTTCTTGACGAGTTCTTCTGATTCGAACATCAGCTAGAAGCATTATAGCTAGTGTTTGATTCACTAGTGCTTACAAATTGCCCCCATGTGTAGGGGACACAGAACCCTTTGAGAAAACTTAG…
