# Supplementary material for: CETCh-seq: CRISPR epitope tagging ChIP-seq of DNA-binding proteins
Source: HighWire-hosted journal article supplement (doi:10.1101/gr.193540.115), 2015-09-09
Supplement: Supplemental_Table_5.xlsx [file Supplemental_Table_5.xlsx]

## Sheet: Sheet1
								Tech Rep	Tech Rep	Bio Rep	Bio Rep	WT Rep1	WT Rep2	WT Rep1	WT Rep2	Modified	Modified
Cells	ChIP Name	Antibody	Aligned reads	Sites	NSC	RSC	Score	Number	%	Number	%	Number	%	Number	%	Number	%
HepG2	WT cell RAD21 Rep1	RAD21	24402198	52752	4.37	2.36	2	N/A	N/A	N/A	N/A	N/A	N/A	N/A	N/A	N/A	N/A
HepG2	WT cell RAD21 Rep2	RAD21	26683150	43104	2.88	2.44	2	N/A	N/A	N/A	N/A	N/A	N/A	N/A	N/A	N/A	N/A
HepG2	Modified cell RAD21	RAD21	17963902	36694	3.79	1.5	2	N/A	N/A	N/A	N/A	N/A	N/A	N/A	N/A	N/A	N/A
HepG2	Modified cell RAD21 Technical Rep1	FLAG	25628743	46041	2.92	1.4	1	40890	0.9104	N/A	N/A	39133	0.85	37358	0.8114	34742	0.9468
HepG2	Modified cell RAD21 Technical Rep2	FLAG	21425619	44916	3.31	1.4	1	40890	0.9104	N/A	N/A	38512	0.8574	36981	0.8233	34536	0.9412
HepG2	WT cell GABPA Rep1	GABPA	11682170	6397	2.38	1.69	2	N/A	N/A	N/A	N/A	N/A	N/A	N/A	N/A	N/A	N/A
HepG2	WT cell GABPA Rep2	GABPA	11453340	5508	2.23	1.63	2	N/A	N/A	N/A	N/A	N/A	N/A	N/A	N/A	N/A	N/A
HepG2	Modified cell GABPA	GABPA	12364374	6340	2.77	1.7	2	N/A	N/A	N/A	N/A	N/A	N/A	N/A	N/A	N/A	N/A
HepG2	Modified cell GABPA Technical Rep1	FLAG	7272940	6800	4.1	1.57	2	6558	0.964	N/A	N/A	4930	0.895	5374	0.84	5606	0.8842
HepG2	Modified cell GABPA Technical Rep2	FLAG	24039879	9463	1.79	1.39	1	6558	0.964	N/A	N/A	5834	0.912	5202	0.9444	6110	0.9637
HepG2	WT cell CREB1 Rep1	CREB1	26956241	10113	1.8	1.22	1	N/A	N/A	N/A	N/A	N/A	N/A	N/A	N/A	N/A	N/A
HepG2	WT cell CREB1 Rep2	CREB1	33562300	5320	1.27	1.19	1	N/A	N/A	N/A	N/A	N/A	N/A	N/A	N/A	N/A	N/A
HepG2	Modified cell CREB1	CREB1	19547246	2486	1.28	1.15	1	N/A	N/A	N/A	N/A	N/A	N/A	N/A	N/A	N/A	N/A
HepG2	Modified cell CREB1 Technical Rep1	FLAG	15947303	7940	1.8	1.25	1	6309	0.8433	6330	0.7972	5850	0.7368	4455	0.8374	2453	0.9867
HepG2	Modified cell CREB1 Technical Rep2	FLAG	19146046	7481	1.65	1.25	1	6309	0.8433	6443	0.8612	6065	0.8107	4415	0.8299	2409	0.969
HepG2	Modified cell CREB1 Biological Rep2	FLAG	26908569	11872	1.4	1.21	1	N/A	N/A	N/A	N/A	8211	0.8119	4614	0.8673	2304	0.9268
HepG2	Modified cell ATF1 Technical Rep1	FLAG	16268705	13922	1.72	1.3	1	8467	0.9321	N/A	N/A	N/A	N/A	N/A	N/A	N/A	N/A
HepG2	Modified cell ATF1 Technical Rep2	FLAG	18685502	9084	1.53	1.3	1	8467	0.9321	N/A	N/A	N/A	N/A	N/A	N/A	N/A	N/A
MCF7	WT cell RAD21 Rep1	RAD21	14766163	38239	3.04	1.9	2	N/A	N/A	N/A	N/A	N/A	N/A	N/A	N/A	N/A	N/A
MCF7	WT cell RAD21 Rep2	RAD21	21138289	39359	2.31	1.57	2	N/A	N/A	N/A	N/A	N/A	N/A	N/A	N/A	N/A	N/A
MCF7	Modified cell RAD21	RAD21	30748884	30104	1.48	1.41	1	N/A	N/A	N/A	N/A	N/A	N/A	N/A	N/A	N/A	N/A
MCF7	Modified cell RAD21 Technical Rep1	FLAG	29995724	42087	1.75	1.78	2	37844	0.8992	35740	0.8492	33857	0.8854	34530	0.8773	28095	0.9333
MCF7	Modified cell RAD21 Technical Rep2	FLAG	25095018	42403	1.76	1.69	2	37844	0.8992	35428	0.8355	33935	0.8874	34397	0.8739	27830	0.9245
MCF7	Modified cell RAD21 Biological Rep2	FLAG	30604419	44140	1.82	1.46	1	N/A	N/A	N/A	N/A	33862	0.8855	35102	0.8918	28994	0.9631
Mouse ES	Modified cell GABPA	FLAG	28852721	2088	1.05	1.05	1	N/A	N/A	N/A	N/A	N/A	N/A	N/A	N/A	N/A	N/A
